# Supplementary material
Source: publisher figshare collection journal article supplement (https://diabetesjournals.figshare.com/ndownloader/files/35939768)
Supplement: Supplementary file 1 [file 35939768]

## Supplemental Material Content

|                                                                                                                                                                                                                                                                                                                                                                                   |    |
|-----------------------------------------------------------------------------------------------------------------------------------------------------------------------------------------------------------------------------------------------------------------------------------------------------------------------------------------------------------------------------------|----|
| <b>Supplemental Table S1</b> Details on national and regional registers used in the current study .....                                                                                                                                                                                                                                                                           | 2  |
| <b>Supplemental Table S2</b> Diagnosis criteria, the International Statistical Classification of Disease codes (ICD-codes), and Anatomical Therapeutic Chemical Classification System codes (ATC-codes) used to define the variables in the study.....                                                                                                                            | 3  |
| <b>Supplemental Table S3</b> Characteristics and incidence of outcomes across sub-cohorts of relatives .....                                                                                                                                                                                                                                                                      | 4  |
| <b>Supplemental Table S4</b> Crude hazard ratio and 95% confidence interval of within-individual association and familial co-aggregation of childhood-onset type 1 diabetes with depression, anxiety, stress-related disorders and using antidepressants or anxiolytics.....                                                                                                      | 5  |
| <b>Supplemental Table S5</b> Within-individual associations and familial co-aggregations of type 1 diabetes with using specific types of antidepressants* .....                                                                                                                                                                                                                   | 6  |
| <b>Supplemental Table S6</b> Hazard ratios and 95% confidence interval of familial co-aggregation between type 1 diabetes and the outcomes estimated after adjusting for the presence of type 1 diabetes in the relatives .....                                                                                                                                                   | 7  |
| <b>Supplemental Table S7</b> Within-individual associations and familial co-aggregations of type 1 diabetes with depression, anxiety, stress-related disorders and using antidepressants or anxiolytics, stratified by sex * .....                                                                                                                                                | 8  |
| <b>Supplemental Table S8</b> Comorbid depression, anxiety and stress-related disorders in individuals with and without type 1 diabetes in the main study cohort.....                                                                                                                                                                                                              | 10 |
| <b>Supplemental Figure S1</b> Flow-chart of study cohort construction .....                                                                                                                                                                                                                                                                                                       | 11 |
| <b>Supplemental Figure S2</b> Survival curve of receiving specific diagnosis of depression, anxiety, or stress-related disorders and using antidepressants or using anxiolytics in individuals diagnosed with childhood-onset type 1 diabetes compared to the matched reference individuals.....                                                                                  | 12 |
| <b>Supplemental Figure S3</b> Survival curve of receiving any diagnosis of depression, anxiety, or stress-related disorders and using antidepressants and anxiolytics in relatives of individuals diagnosed with childhood-onset type 1 diabetes compared to the matched relatives of individuals without childhood-onset type 1 diabetes * .....                                 | 13 |
| <b>Supplemental Figure S6</b> Survival curve of receiving specific diagnosis of depression, anxiety, or stress-related disorders, using antidepressants, and using anxiolytics in maternal half-siblings of individuals diagnosed with childhood-onset type 1 diabetes compared to the matched maternal half-siblings of individuals without childhood-onset type 1 diabetes..... | 16 |
| <b>Supplemental Figure S7</b> Survival curve of receiving specific diagnosis of depression, anxiety, or stress-related disorders, using antidepressants, and using anxiolytics in paternal half-siblings of individuals diagnosed with childhood-onset type 1 diabetes compared to the matched paternal half-siblings of individuals without childhood-onset type 1 diabetes..... | 17 |
| <b>Supplemental File 1</b> Description of construction process of matched sub-samples from each relative sub-cohorts .....                                                                                                                                                                                                                                                        | 18 |
| <b>References</b> .....                                                                                                                                                                                                                                                                                                                                                           | 19 |

**Supplemental Table S1** Details on national and regional registers used in the current study

| <b>Register, coverage period</b>              | <b>Summary of available information</b>                                                                                                                                                                                                                                                                                                                                                                                                                                                                                                                                   |
|-----------------------------------------------|---------------------------------------------------------------------------------------------------------------------------------------------------------------------------------------------------------------------------------------------------------------------------------------------------------------------------------------------------------------------------------------------------------------------------------------------------------------------------------------------------------------------------------------------------------------------------|
| The Swedish National Diabetes Register, 1996- | The Swedish National Diabetes Register (NDR) was launched in 1996, and integrate both hospitals and primary care clinics. Patient's data are either reported continuously via electronic medical records, through local extraction software or registered directly online. The NDR defines type 1 diabetes as receiving insulin treatment and diagnosis before or at age 30, which has been validated in 97% of cases [1]. Diabetes-related data, even those prior to the 1996, are retrieved from the patient by linking via the patient's personal identify number.     |
| The Swediabkids Database, 2000-               | The Swediabkids database was established in 2000 and collected information for more than 95% of Swedish children and adolescents with type 1 diabetes, which contains outpatient records from all pediatric diabetes centers in Sweden. Since 2007 the registry has included data on almost all (98%) children and adolescents with diabetes in Sweden, and since 2008 information on severe hypoglycemia is recorded [2]. Diabetes-related data, even those prior to 2000, are retrieved from the patient records by linking via the patient's personal identify number. |
| The National Patient Register, 1964-          | The National Patient Register (NPR) provides information on inpatient (nationwide coverage since 1987) and outpatients (since 2001) specialist health care facilities. Diagnoses are coded using the International Classification of Diseases (ICD) 7-10 and given by a consultant physician at the time of discharge. The validity of many diagnoses has been evaluated and found to be 95-100% [3].                                                                                                                                                                     |
| The Multi-Generation Register, 1932-          | The Multi-Generation Register contains information that links Swedish residents to their parents [4].                                                                                                                                                                                                                                                                                                                                                                                                                                                                     |
| The Total Population Register, 1961-          | The Total population Register contains information on life events, including birth, death, marital status, migration for the Swedish population [5].                                                                                                                                                                                                                                                                                                                                                                                                                      |
| The Swedish Prescribed Drug Register, 2005-   | The prescribed drug register has had complete coverage of prescriptions in Sweden since July 2005, coded according to the Anatomical Therapeutic Chemical (ATC) classification system [6].                                                                                                                                                                                                                                                                                                                                                                                |

**Supplemental Table S2** Diagnosis criteria, the International Statistical Classification of Disease codes (ICD-codes), and Anatomical Therapeutic Chemical Classification System codes (ATC-codes) used to define the variables in the study

| Variable                                    | Used register and corresponding diagnostic criteria                                                                      |                                                                                                                                 |                                           |
|---------------------------------------------|--------------------------------------------------------------------------------------------------------------------------|---------------------------------------------------------------------------------------------------------------------------------|-------------------------------------------|
| Exposure                                    | Swediabkids                                                                                                              | The Swedish Diabetes Register                                                                                                   |                                           |
| Type 1 diabetes                             | Being diagnosed with type 1 diabetes (ICD-10 code E10), which is recorded from all pediatric diabetes centers in Sweden. | Receiving insulin treatment and diagnosis before or at age 30. This criterion has been validated for 97% of the total patients. |                                           |
| Outcomes                                    |                                                                                                                          |                                                                                                                                 |                                           |
| Diagnoses                                   | National Patient Register, ICD-codes                                                                                     |                                                                                                                                 |                                           |
|                                             | ICD-8<br>(1969-1986)                                                                                                     | ICD-9<br>(1987-1996)                                                                                                            | ICD-10<br>(1997-)                         |
| Depression                                  | 300.4                                                                                                                    | 296B, 300E, 311                                                                                                                 | F32, F33, F34 (excluding F34.0), F38, F39 |
| Anxiety disorders                           | 300.00, 300.20, 307                                                                                                      | 300A, 300C, 300X, 308-309                                                                                                       | F40, F41                                  |
| Stress-related disorders                    | 307                                                                                                                      | 308-309                                                                                                                         | F43                                       |
| Using prescribed medications                | Prescribed Drug Register, ATC-codes                                                                                      |                                                                                                                                 |                                           |
| Antidepressants                             | N06A                                                                                                                     |                                                                                                                                 |                                           |
| Non-selective monoamine reuptake inhibitors | N06AA                                                                                                                    |                                                                                                                                 |                                           |
| Selective serotonin reuptake inhibitors     | N06AB, N06AE02                                                                                                           |                                                                                                                                 |                                           |
| Others                                      | N06C, N06AF, N06AG, N06AX, N06AE06                                                                                       |                                                                                                                                 |                                           |
| Anxiolytics                                 | N05B, N05C                                                                                                               |                                                                                                                                 |                                           |
| Exclusion Criteria                          | National Patient Register, ICD-codes                                                                                     |                                                                                                                                 |                                           |
|                                             | ICD-8<br>(1969-1986)                                                                                                     | ICD-9<br>(1987-1996)                                                                                                            | ICD-10<br>(1997-)                         |
| Chromosomal abnormality                     | 759.30-759.50,759.83,310.5,311.50,312.50,313.50,314.50,315.50                                                            | 758                                                                                                                             | Q90-Q99                                   |

**Supplemental Table S3** Characteristics and incidence of outcomes across sub-cohorts of relatives

|                                                                                   | <b>Parents</b> | <b>Full-siblings</b> | <b>Maternal half-siblings</b> | <b>Paternal half-siblings</b> | <b>Cousins</b> |
|-----------------------------------------------------------------------------------|----------------|----------------------|-------------------------------|-------------------------------|----------------|
| <b>Unique individuals, n*</b>                                                     | 6,617,950      | 2,596,984            | 484,181                       | 495,183                       | 2,953,507      |
| <b>Unique relative pairs, n †</b>                                                 | 6,936,914      | 3,970,352            | 750,090                       | 810,026                       | 19,056,970     |
| <b>Unique individual diagnosed with type 1 diabetes, n (%) ‡</b>                  | 20,005 (0.3)   | 15,314 (0.6)         | 2821 (0.6)                    | 2870 (0.6)                    | 17,596 (0.6)   |
| <b>Any diagnosis of depression, anxiety, or stress-related disorders, n (%) §</b> | 525,241 (7.9)  | 174,450 (6.7)        | 55,718 (11.5)                 | 52,330 (10.6)                 | 215,041 (7.3)  |
| <b>Depression, n (%) §</b>                                                        | 307,106 (4.6)  | 100,141 (3.9)        | 31,504 (6.5)                  | 29,522 (6.0)                  | 123,177 (4.2)  |
| <b>Anxiety, n (%) §</b>                                                           | 256,182 (3.9)  | 98,202 (3.8)         | 31,774 (6.6)                  | 29,783 (6.0)                  | 121,142 (4.1)  |
| <b>Stress-related disorders, n (%) §</b>                                          | 176,575 (2.7)  | 47,931 (1.8)         | 17,741 (3.7)                  | 16,348 (3.3)                  | 60,963 (2.1)   |
| <b>Using antidepressants or anxiolytics, n (%) §</b>                              | 552,821 (16.2) | 391,829 (15.4)       | 105,991 (22.3)                | 102,065 (21.1)                | 486,450 (16.5) |

\* Unique individuals: as relative sub-cohorts comprised all possible relative-pairs, the index person A can appear in the sub-cohort with a relative person B, but can also with a relative person C. The 'count of unique individual' means to count the index person A only once.

† Number of unique relative pairs used in the statistical analysis, where index person A with relative person B could also be analyzed as index person B with relative A, if they fulfilled the requirement for each cohort.

‡ Number of unique individuals who contributed to that relative sub-cohort and being diagnosed with type 1 diabetes.

§ Number of unique individuals with outcomes in each relative sub-cohort; the percentage in parentheses is the incidence of each outcome for each relative type, except for using antidepressants or anxiolytics where the denominator was each relative type reminded to reside in Sweden since 2005.

**Supplemental Table S4** Crude hazard ratio and 95% confidence interval of within-individual association and familial co-aggregation of childhood-onset type 1 diabetes with depression, anxiety, stress-related disorders and using antidepressants or anxiolytics

| Outcome                                                                  | Individuals       | Parents           | Full-siblings     | Maternal half-siblings | Paternal half-siblings | Cousins           |
|--------------------------------------------------------------------------|-------------------|-------------------|-------------------|------------------------|------------------------|-------------------|
| <b>Any diagnosis of depression, anxiety and stress-related disorders</b> |                   |                   |                   |                        |                        |                   |
| Crude                                                                    | 1.73 (1.67, 1.80) | 1.22 (1.17, 1.27) | 1.20 (1.13, 1.26) | 1.12 (1.01, 1.24)      | 1.14 (1.02, 1.28)      | 1.12 (1.09, 1.15) |
| <b>Depression</b>                                                        |                   |                   |                   |                        |                        |                   |
| Crude                                                                    | 1.93 (1.84, 2.02) | 1.21 (1.14, 1.27) | 1.20 (1.11, 1.29) | 1.21 (1.05, 1.38)      | 1.14 (1.00, 1.29)      | 1.15 (1.11, 1.19) |
| <b>Anxiety</b>                                                           |                   |                   |                   |                        |                        |                   |
| Crude                                                                    | 1.53 (1.44, 1.62) | 1.23 (1.16, 1.31) | 1.20 (1.11, 1.28) | 1.14 (1.00, 1.36)      | 1.17 (1.01, 1.35)      | 1.12 (1.09, 1.16) |
| <b>Stress-related disorders</b>                                          |                   |                   |                   |                        |                        |                   |
| Crude                                                                    | 1.83 (1.70, 1.98) | 1.27 (1.19, 1.36) | 1.27 (1.15, 1.40) | 0.98 (0.82, 1.17)      | 1.17 (0.96, 1.41)      | 1.05 (1.00, 1.10) |
| <b>Using any of antidepressants or anxiolytics †</b>                     |                   |                   |                   |                        |                        |                   |
| Crude                                                                    | 1.39 (1.35, 1.44) | 1.18 (1.16, 1.21) | 1.14 (1.09, 1.18) | 1.15 (1.06, 1.24)      | 1.28 (1.19, 1.38)      | 1.13 (1.11, 1.15) |
| <b>Using antidepressants†</b>                                            |                   |                   |                   |                        |                        |                   |
| Crude                                                                    | 1.48 (1.43, 1.54) | 1.24 (1.21, 1.27) | 1.12 (1.07, 1.18) | 1.10 (1.00, 1.21)      | 1.25 (1.14, 1.37)      | 1.10 (1.07, 1.12) |
| <b>Using anxiolytics†</b>                                                |                   |                   |                   |                        |                        |                   |
| Crude                                                                    | 1.34 (1.29, 1.39) | 1.16 (1.13, 1.19) | 1.15 (1.10, 1.20) | 1.10 (1.01, 1.20)      | 1.27 (1.17, 1.38)      | 1.14 (1.12, 1.17) |

**Supplemental Table S5** Within-individual associations and familial co-aggregations of type 1 diabetes with using specific types of antidepressants\*

| Outcome                                                       | Individuals       | Parents           | Full-siblings     | Maternal half-siblings | Paternal half-siblings | Cousins           |
|---------------------------------------------------------------|-------------------|-------------------|-------------------|------------------------|------------------------|-------------------|
| <b>Non-selective monoamine reuptake inhibitors (Non-SSRI)</b> |                   |                   |                   |                        |                        |                   |
| <b>Crude</b>                                                  | 1.63 (1.42, 1.88) | 1.20 (1.13, 1.27) | 1.00 (0.84, 1.19) | 1.28 (0.94, 1.74)      | 1.54 (1.11, 2.13)      | 1.06 (0.98, 1.14) |
| <b>Adjusted†</b>                                              | 1.58 (1.37, 1.82) | 1.18 (1.11, 1.26) | 0.95 (0.80, 1.13) | 1.21 (0.89, 1.64)      | 1.41 (1.02, 1.95)      | 0.99 (0.92, 1.07) |
| <b>Selective serotonin reuptake inhibitors (SSRI)</b>         |                   |                   |                   |                        |                        |                   |
| <b>Crude</b>                                                  | 1.44 (1.38, 1.51) | 1.27 (1.23, 1.31) | 1.15 (1.10, 1.22) | 1.08 (0.97, 1.20)      | 1.24 (1.12, 1.38)      | 1.11 (1.08, 1.13) |
| <b>Adjusted†</b>                                              | 1.36 (1.31, 1.43) | 1.28 (1.24, 1.32) | 1.08 (1.02, 1.13) | 0.98 (0.88, 1.09)      | 1.09 (0.98, 1.21)      | 1.01 (0.98, 1.03) |
| <b>Other types of antidepressants</b>                         |                   |                   |                   |                        |                        |                   |
| <b>Crude</b>                                                  | 1.61 (1.47, 1.77) | 1.18 (1.12, 1.25) | 1.06 (0.94, 1.18) | 1.08 (0.88, 1.33)      | 1.23 (1.01, 1.49)      | 1.06 (1.01, 1.11) |
| <b>Adjusted†</b>                                              | 1.54 (1.40, 1.69) | 1.17 (1.11, 1.24) | 1.01 (0.90, 1.13) | 1.03 (0.84, 1.26)      | 1.13 (0.93, 1.38)      | 1.00 (0.95, 1.05) |

\*Analyzed in individuals who remained reside in Sweden since 2005.

†Adjusted for sex and birth cohort of the index individual and the relative.

**Supplemental Table S6** Hazard ratios and 95% confidence interval of familial co-aggregation between type 1 diabetes and the outcomes estimated after adjusting for the presence of type 1 diabetes in the relatives

| Outcome                                                                  | Parents           | Full-siblings     | Maternal half-siblings | Paternal half-siblings | Cousins           |
|--------------------------------------------------------------------------|-------------------|-------------------|------------------------|------------------------|-------------------|
| <b>Any diagnosis of depression, anxiety and stress-related disorders</b> |                   |                   |                        |                        |                   |
| <b>Adjusted*</b>                                                         | 1.20 (1.15, 1.25) | 1.06 (1.01, 1.12) | 1.01 (0.91, 1.12)      | 0.99 (0.89, 1.11)      | 1.01 (0.99, 1.04) |
| <b>Depression</b>                                                        |                   |                   |                        |                        |                   |
| <b>Adjusted</b>                                                          | 1.18 (1.12, 1.25) | 1.06 (0.98, 1.13) | 1.09 (0.95, 1.25)      | 1.00 (0.86, 1.16)      | 1.04 (1.01, 1.08) |
| <b>Anxiety</b>                                                           |                   |                   |                        |                        |                   |
| <b>Adjusted</b>                                                          | 1.21 (1.14, 1.29) | 1.07 (1.00, 1.15) | 1.02 (0.89, 1.17)      | 1.01 (0.87, 1.16)      | 1.01 (0.97, 1.04) |
| <b>Stress-related disorders</b>                                          |                   |                   |                        |                        |                   |
| <b>Adjusted</b>                                                          | 1.24 (1.16, 1.33) | 1.14 (1.03, 1.25) | 0.90 (0.75, 1.07)      | 1.05 (0.86, 1.27)      | 0.97 (0.93, 1.02) |
| <b>Using antidepressants or anxiolytics †</b>                            |                   |                   |                        |                        |                   |
| <b>Adjusted</b>                                                          | 1.18 (1.15, 1.20) | 1.03 (0.99, 1.07) | 1.02 (0.94, 1.10)      | 1.10 (1.03, 1.19)      | 1.01 (0.99, 1.03) |
| <b>Using antidepressants†</b>                                            |                   |                   |                        |                        |                   |
| <b>Adjusted</b>                                                          | 1.23 (1.20, 1.26) | 1.03 (0.98, 1.08) | 1.00 (0.91, 1.10)      | 1.11 (1.01, 1.21)      | 1.00 (0.98, 1.03) |
| <b>Using anxiolytics†</b>                                                |                   |                   |                        |                        |                   |
| <b>Adjusted</b>                                                          | 1.15 (1.12, 1.18) | 1.04 (0.99, 1.08) | 0.97 (0.89, 1.06)      | 1.09 (1.00, 1.18)      | 1.09 (1.00, 1.18) |

\* Adjusted for sex and birth cohort of the index individual and the relative, and the presence of type 1 diabetes in relatives.

† Using antidepressants or anxiolytics were analysed in individuals who remained reside in Sweden since 2005.

**Supplemental Table S7** Within-individual associations and familial co-aggregations of type 1 diabetes with depression, anxiety, stress-related disorders and using antidepressants or anxiolytics, stratified by sex \*

| Outcome                                                                  | Individuals       | Parents           | Full-siblings     | Maternal half-siblings        | Paternal half-siblings        | Cousins               |
|--------------------------------------------------------------------------|-------------------|-------------------|-------------------|-------------------------------|-------------------------------|-----------------------|
| <b>Males</b>                                                             |                   |                   |                   |                               |                               |                       |
|                                                                          | <b>Males</b>      | <b>Fathers</b>    | <b>Brothers</b>   | <b>Maternal half-brothers</b> | <b>Paternal half-brothers</b> | <b>Male-cousins</b>   |
| <b>Any diagnosis of depression, anxiety and stress-related disorders</b> |                   |                   |                   |                               |                               |                       |
| <b>Crude</b>                                                             | 1.76 (1.64, 1.88) | 1.16 (1.08, 1.24) | 1.11 (0.94, 1.31) | 1.11 (0.94, 1.31)             | 1.08 (0.91, 1.29)             | 1.12 (1.07, 1.16)     |
| <b>Adjusted†</b>                                                         | 1.62 (1.51, 1.73) | 1.15 (1.07, 1.23) | 1.01 (0.86, 1.20) | 1.01 (0.86, 1.20)             | 0.97 (0.81, 1.15)             | 1.02 (0.98, 1.06)     |
| <b>Depression</b>                                                        |                   |                   |                   |                               |                               |                       |
| <b>Crude</b>                                                             | 1.92 (1.76, 2.10) | 1.17 (1.07, 1.27) | 1.10 (0.88, 1.37) | 1.10 (0.88, 1.37)             | 1.03 (0.82, 1.31)             | 1.15 (1.09, 1.21)     |
| <b>Adjusted</b>                                                          | 1.77 (1.62, 1.93) | 1.16 (1.07, 1.26) | 1.02 (0.82, 1.27) | 1.02 (0.82, 1.27)             | 0.93 (0.73, 1.17)             | 1.05 (1.00, 1.10)     |
| <b>Anxiety</b>                                                           |                   |                   |                   |                               |                               |                       |
| <b>Crude</b>                                                             | 1.49 (1.35, 1.64) | 1.19 (1.08, 1.32) | 1.16 (0.94, 1.44) | 1.16 (0.94, 1.44)             | 1.15 (0.92, 1.44)             | 1.11 (1.05, 1.17)     |
| <b>Adjusted</b>                                                          | 1.54 (1.23, 1.50) | 1.19 (1.08, 1.31) | 1.06 (0.86, 1.31) | 1.06 (0.86, 1.31)             | 1.02 (0.82, 1.28)             | 1.00 (0.95, 1.06)     |
| <b>Stress-related disorders</b>                                          |                   |                   |                   |                               |                               |                       |
| <b>Crude</b>                                                             | 1.92 (1.69, 2.18) | 1.21 (1.09, 1.35) | 0.94 (0.69, 1.28) | 0.94 (0.69, 1.28)             | 0.98 (0.71, 1.36)             | 1.04 (0.96, 1.12)     |
| <b>Adjusted</b>                                                          | 1.80 (1.58, 2.04) | 1.20 (1.08, 1.34) | 0.88 (0.64, 1.19) | 0.88 (0.64, 1.19)             | 0.91 (0.66, 1.25)             | 0.97 (0.90, 1.05)     |
| <b>Using antidepressants or anxiolytics ‡</b>                            |                   |                   |                   |                               |                               |                       |
| <b>Crude</b>                                                             | 1.42 (1.35, 1.49) | 1.14 (1.11, 1.18) | 1.13 (1.07, 1.20) | 1.13 (1.01, 1.27)             | 1.21 (1.08, 1.36)             | 1.13 (1.10, 1.16)     |
| <b>Adjusted</b>                                                          | 1.30 (1.23, 1.36) | 1.14 (1.10, 1.17) | 1.04 (0.98, 1.10) | 1.00 (0.89, 1.13)             | 1.05 (0.94, 1.17)             | 1.01 (0.98, 1.04)     |
| <b>Using antidepressants ‡</b>                                           |                   |                   |                   |                               |                               |                       |
| <b>Crude</b>                                                             | 1.53 (1.44, 1.63) | 1.19 (1.14, 1.24) | 1.12 (1.05, 1.21) | 1.09 (0.94, 1.26)             | 1.20 (1.04, 1.38)             | 1.08 (1.04, 1.12)     |
| <b>Adjusted</b>                                                          | 1.42 (1.34, 1.51) | 1.20 (1.15, 1.25) | 1.05 (0.98, 1.13) | 1.01 (0.87, 1.17)             | 1.09 (0.94, 1.26)             | 1.00 (0.96, 1.03)     |
| <b>Using anxiolytics‡</b>                                                |                   |                   |                   |                               |                               |                       |
| <b>Crude</b>                                                             | 1.35 (1.27, 1.43) | 1.13 (1.09, 1.16) | 1.15 (1.08, 1.23) | 1.10 (0.96, 1.25)             | 1.22 (1.08, 1.38)             | 1.14 (1.10, 1.17)     |
| <b>Adjusted</b>                                                          | 1.22 (1.15, 1.3)  | 1.13 (1.09, 1.17) | 1.06 (0.99, 1.13) | 0.97 (0.85, 1.10)             | 1.05 (0.93, 1.19)             | 1.01 (0.98, 1.04)     |
| <b>Females</b>                                                           |                   |                   |                   |                               |                               |                       |
|                                                                          | <b>Females</b>    | <b>Mothers</b>    | <b>Sisters</b>    | <b>Maternal half-sisters</b>  | <b>Paternal half-Sisters</b>  | <b>Female-cousins</b> |
| <b>Any diagnosis of depression, anxiety and stress-related disorders</b> |                   |                   |                   |                               |                               |                       |



|                                               |                   |                   |                   |                   |                   |                   |
|-----------------------------------------------|-------------------|-------------------|-------------------|-------------------|-------------------|-------------------|
| <b>Crude</b>                                  | 1.79 (1.69, 1.90) | 1.22 (1.15, 1.28) | 1.11 (0.98, 1.27) | 1.11 (0.98, 1.27) | 1.17 (1.02, 1.34) | 1.13 (1.09, 1.16) |
| <b>Adjusted</b>                               | 1.65 (1.56, 1.75) | 1.19 (1.13, 1.26) | 1.02 (0.89, 1.16) | 1.02 (0.89, 1.16) | 1.02 (0.89, 1.18) | 1.01 (0.98, 1.05) |
| <b>Depression</b>                             |                   |                   |                   |                   |                   |                   |
| <b>Crude</b>                                  | 2.03 (1.90, 2.18) | 1.19 (1.12, 1.27) | 1.25 (1.07, 1.47) | 1.25 (1.07, 1.47) | 1.22 (1.02, 1.46) | 1.16 (1.11, 1.20) |
| <b>Adjusted</b>                               | 1.87 (1.75, 2.01) | 1.17 (1.10, 1.25) | 1.15 (0.98, 1.36) | 1.15 (0.98, 1.36) | 1.07 (0.89, 1.28) | 1.04 (1.00, 1.09) |
| <b>Anxiety</b>                                |                   |                   |                   |                   |                   |                   |
| <b>Crude</b>                                  | 1.60 (1.48, 1.73) | 1.21 (1.12, 1.30) | 1.11 (0.94, 1.32) | 1.11 (0.94, 1.32) | 1.17 (0.97, 1.40) | 1.14 (1.09, 1.19) |
| <b>Adjusted</b>                               | 1.45 (1.34, 1.57) | 1.18 (1.10, 1.27) | 1.00 (0.85, 1.19) | 1.00 (0.85, 1.19) | 1.00 (0.84, 1.20) | 1.01 (0.97, 1.05) |
| <b>Stress-related disorders</b>               |                   |                   |                   |                   |                   |                   |
| <b>Crude</b>                                  | 1.84 (1.66, 2.03) | 1.26 (1.16, 1.36) | 0.98 (0.79, 1.23) | 0.98 (0.79, 1.23) | 1.25 (1.00, 1.58) | 1.05 (0.99, 1.12) |
| <b>Adjusted</b>                               | 1.72 (1.56, 1.90) | 1.23 (1.13, 1.33) | 0.92 (0.73, 1.14) | 0.92 (0.73, 1.14) | 1.13 (0.90, 1.43) | 0.97 (0.92, 1.03) |
| <b>Using antidepressants or anxiolytics ‡</b> |                   |                   |                   |                   |                   |                   |
| <b>Crude</b>                                  | 1.41 (1.35, 1.48) | 1.18 (1.15, 1.21) | 1.15 (1.09, 1.20) | 1.14 (1.04, 1.26) | 1.33 (1.21, 1.46) | 1.13 (1.11, 1.16) |
| <b>Adjusted</b>                               | 1.31 (1.25, 1.37) | 1.15 (1.12, 1.17) | 1.05 (1.00, 1.10) | 1.03 (0.94, 1.14) | 1.15 (1.05, 1.27) | 1.02 (0.99, 1.04) |
| <b>Using antidepressants ‡</b>                |                   |                   |                   |                   |                   |                   |
| <b>Crude</b>                                  | 1.49 (1.42, 1.57) | 1.22 (1.19, 1.26) | 1.13 (1.07, 1.20) | 1.09 (0.97, 1.22) | 1.28 (1.14, 1.43) | 1.11 (1.08, 1.14) |
| <b>Adjusted</b>                               | 1.39 (1.32, 1.47) | 1.20 (1.16, 1.23) | 1.05 (0.99, 1.12) | 1.01 (0.90, 1.13) | 1.13 (1.01, 1.26) | 1.01 (0.99, 1.04) |
| <b>Using anxiolytics ‡</b>                    |                   |                   |                   |                   |                   |                   |
| <b>Crude</b>                                  | 1.37 (1.30, 1.44) | 1.15 (1.12, 1.18) | 1.15 (1.09, 1.22) | 1.10 (0.98, 1.22) | 1.30 (1.17, 1.45) | 1.15 (1.12, 1.18) |
| <b>Adjusted</b>                               | 1.26 (1.19, 1.32) | 1.12 (1.09, 1.52) | 1.05 (0.99, 1.11) | 0.98 (0.88, 1.10) | 1.12 (1.01, 1.24) | 1.02 (1.00, 1.05) |

\* Analyses were stratified by the sex of the outcome person, i.e. males vs. females with/without type 1 diabetes, mothers vs. fathers of individual with/without type 1 diabetes or brothers vs. sisters of individuals with/without type 1 diabetes.

† Adjusted for sex and birth cohort of the index individual and the relative.

‡ Number of unique individuals who contributed to that relative sub-cohort and being diagnosed with type 1 diabetes.

**Supplemental Table S8** Comorbid depression, anxiety and stress-related disorders in individuals with and without type 1 diabetes in the main study cohort

| Comorbid diagnoses of depression, anxiety or stress-related disorders, n (%) | Type 1 diabetes | No type 1 diabetes |
|------------------------------------------------------------------------------|-----------------|--------------------|
| All three                                                                    | 176 (0.9)       | 17,000 (0.5)       |
| Depression and anxiety                                                       | 390 (2.0)       | 42,309 (1.2)       |
| Depression and stress-related disorders                                      | 137 (0.7)       | 13,059 (0.4)       |
| Anxiety and stress-related disorders                                         | 68 (0.3)        | 9990 (0.3)         |

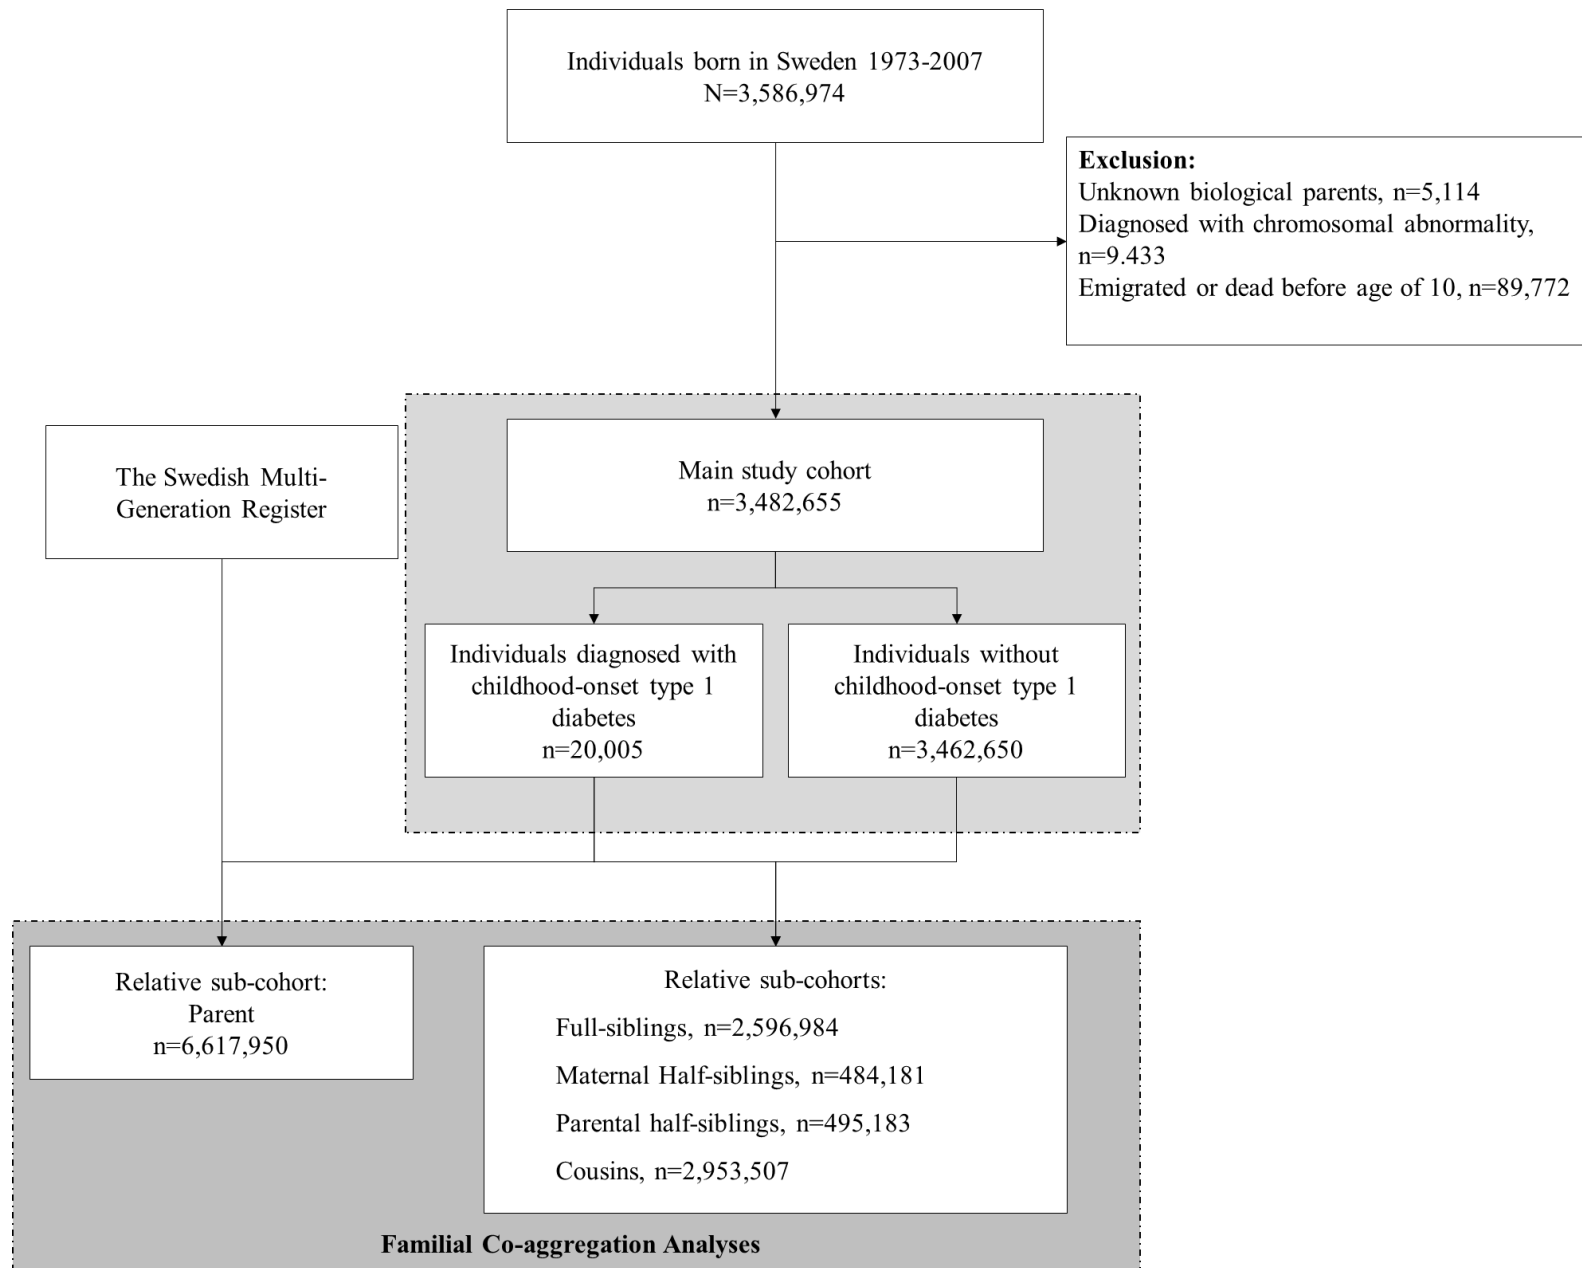

**Supplemental Figure S1** Flow-chart of study cohort construction

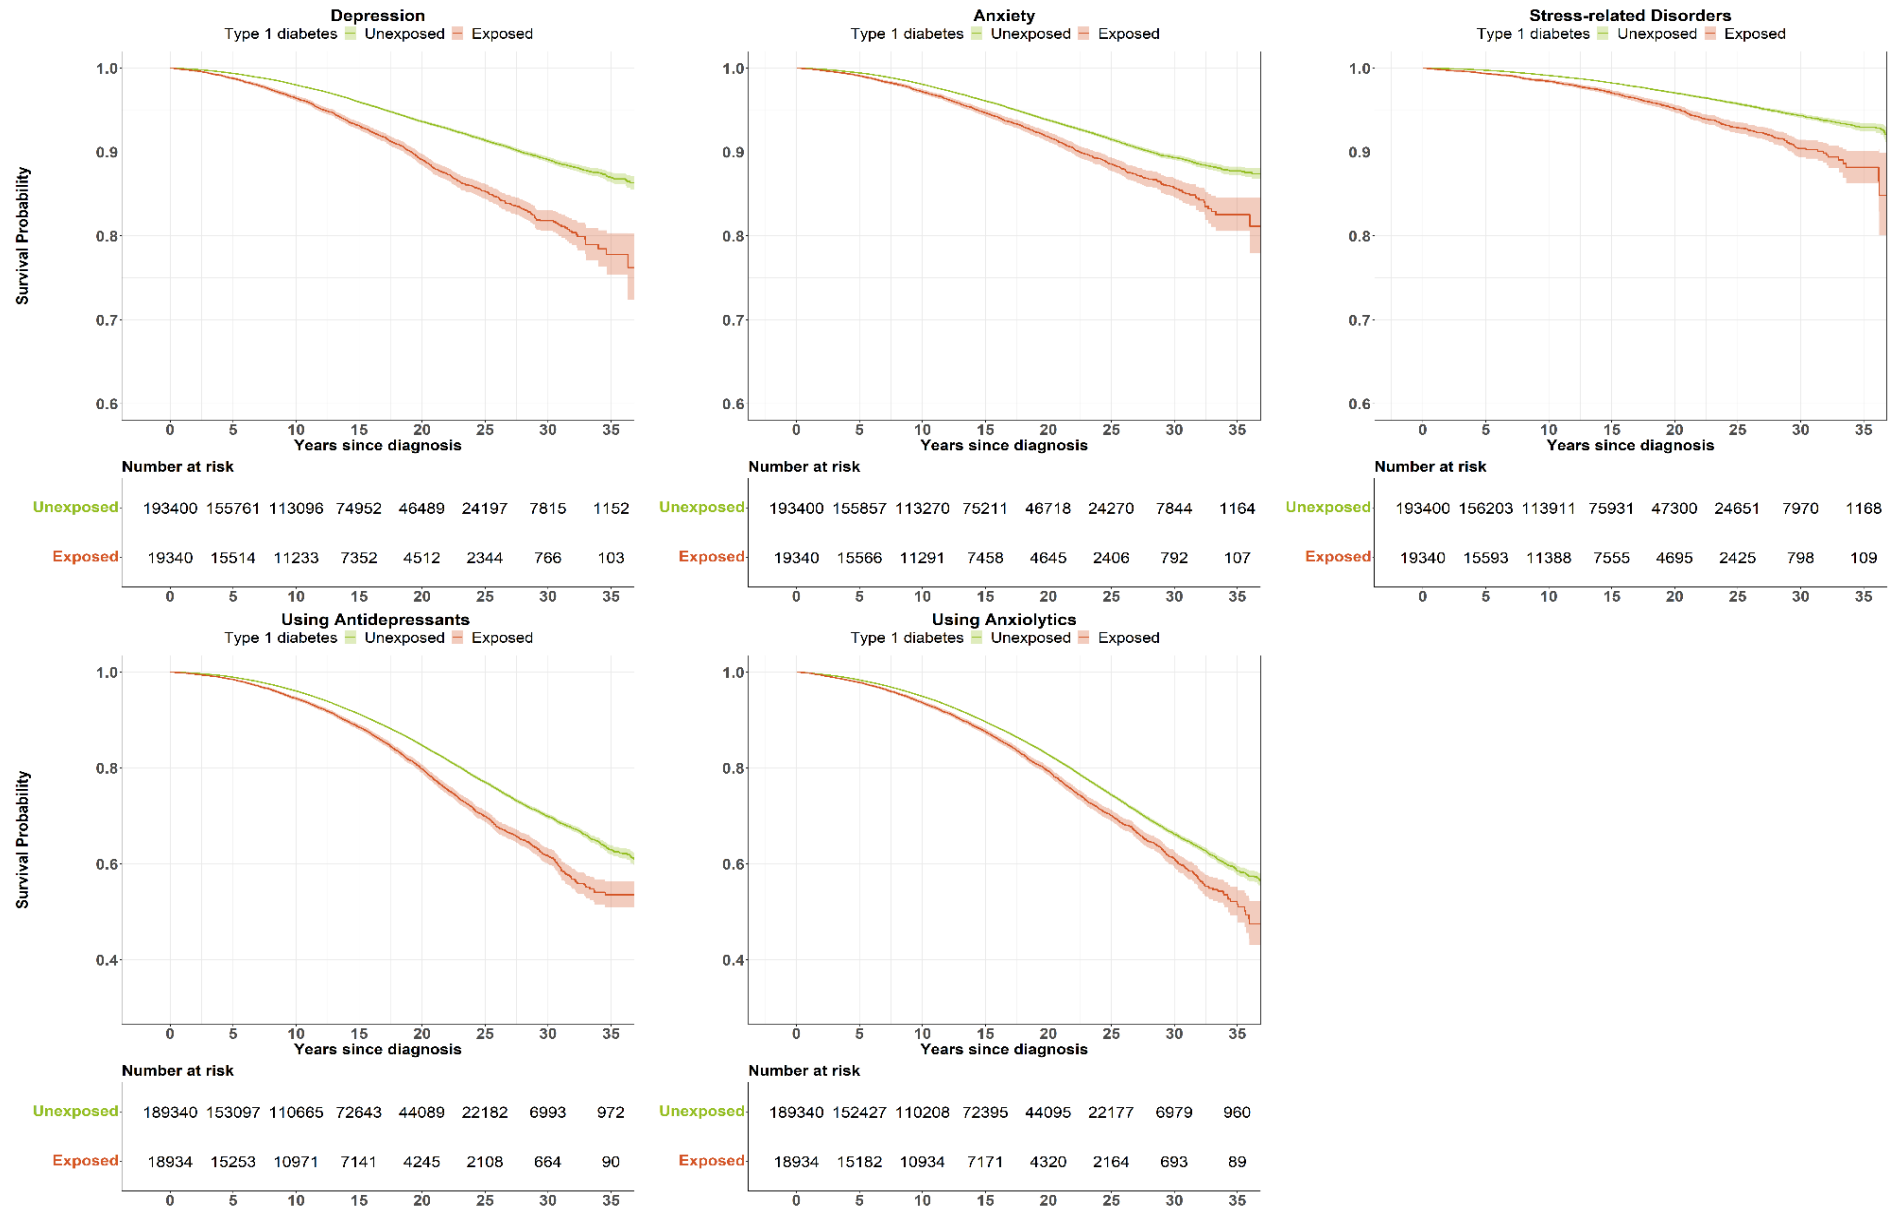

**Supplemental Figure S2** Survival curve of receiving specific diagnosis of depression, anxiety, or stress-related disorders and using antidepressants or using anxiolytics in individuals diagnosed with childhood-onset type 1 diabetes compared to the matched reference individuals.

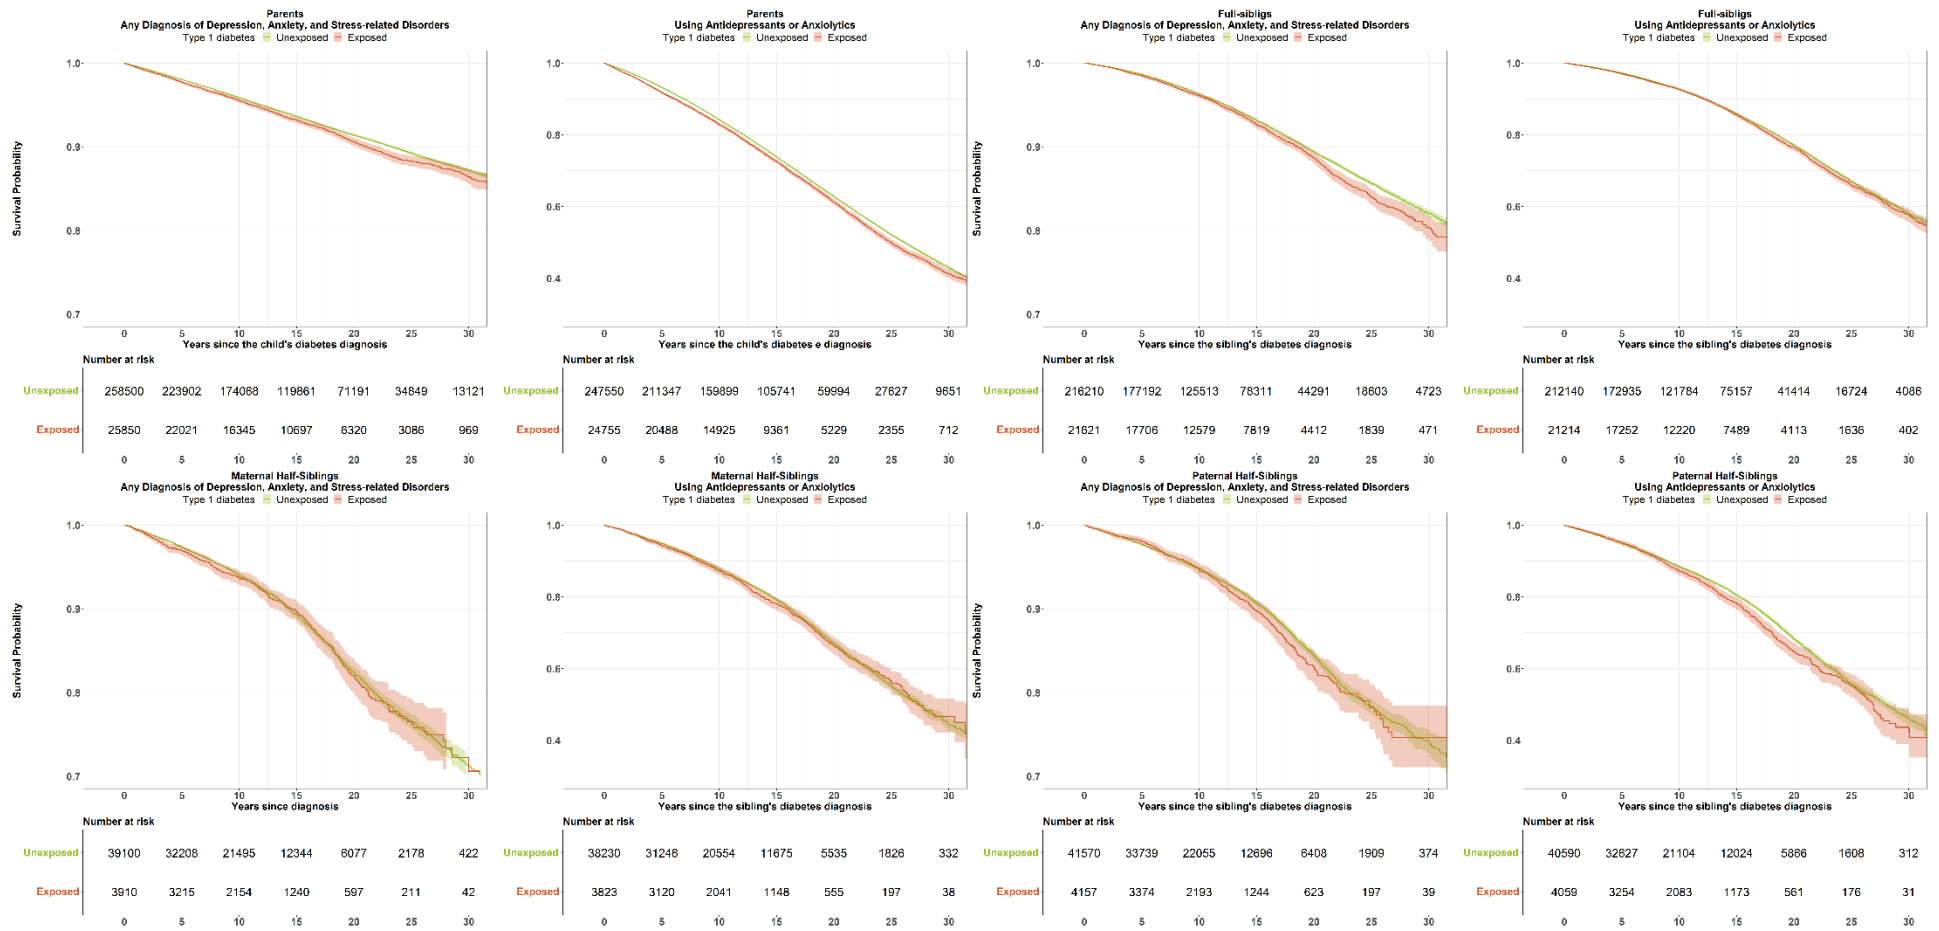

**Supplemental Figure S3** Survival curve of receiving any diagnosis of depression, anxiety, or stress-related disorders and using antidepressants and anxiolytics in relatives of individuals diagnosed with childhood-onset type 1 diabetes compared to the matched relatives of individuals without childhood-onset type 1 diabetes \*

\* Survival curves of specific diagnoses of each type of relatives are shown in **Supplemental Figure 4-7**

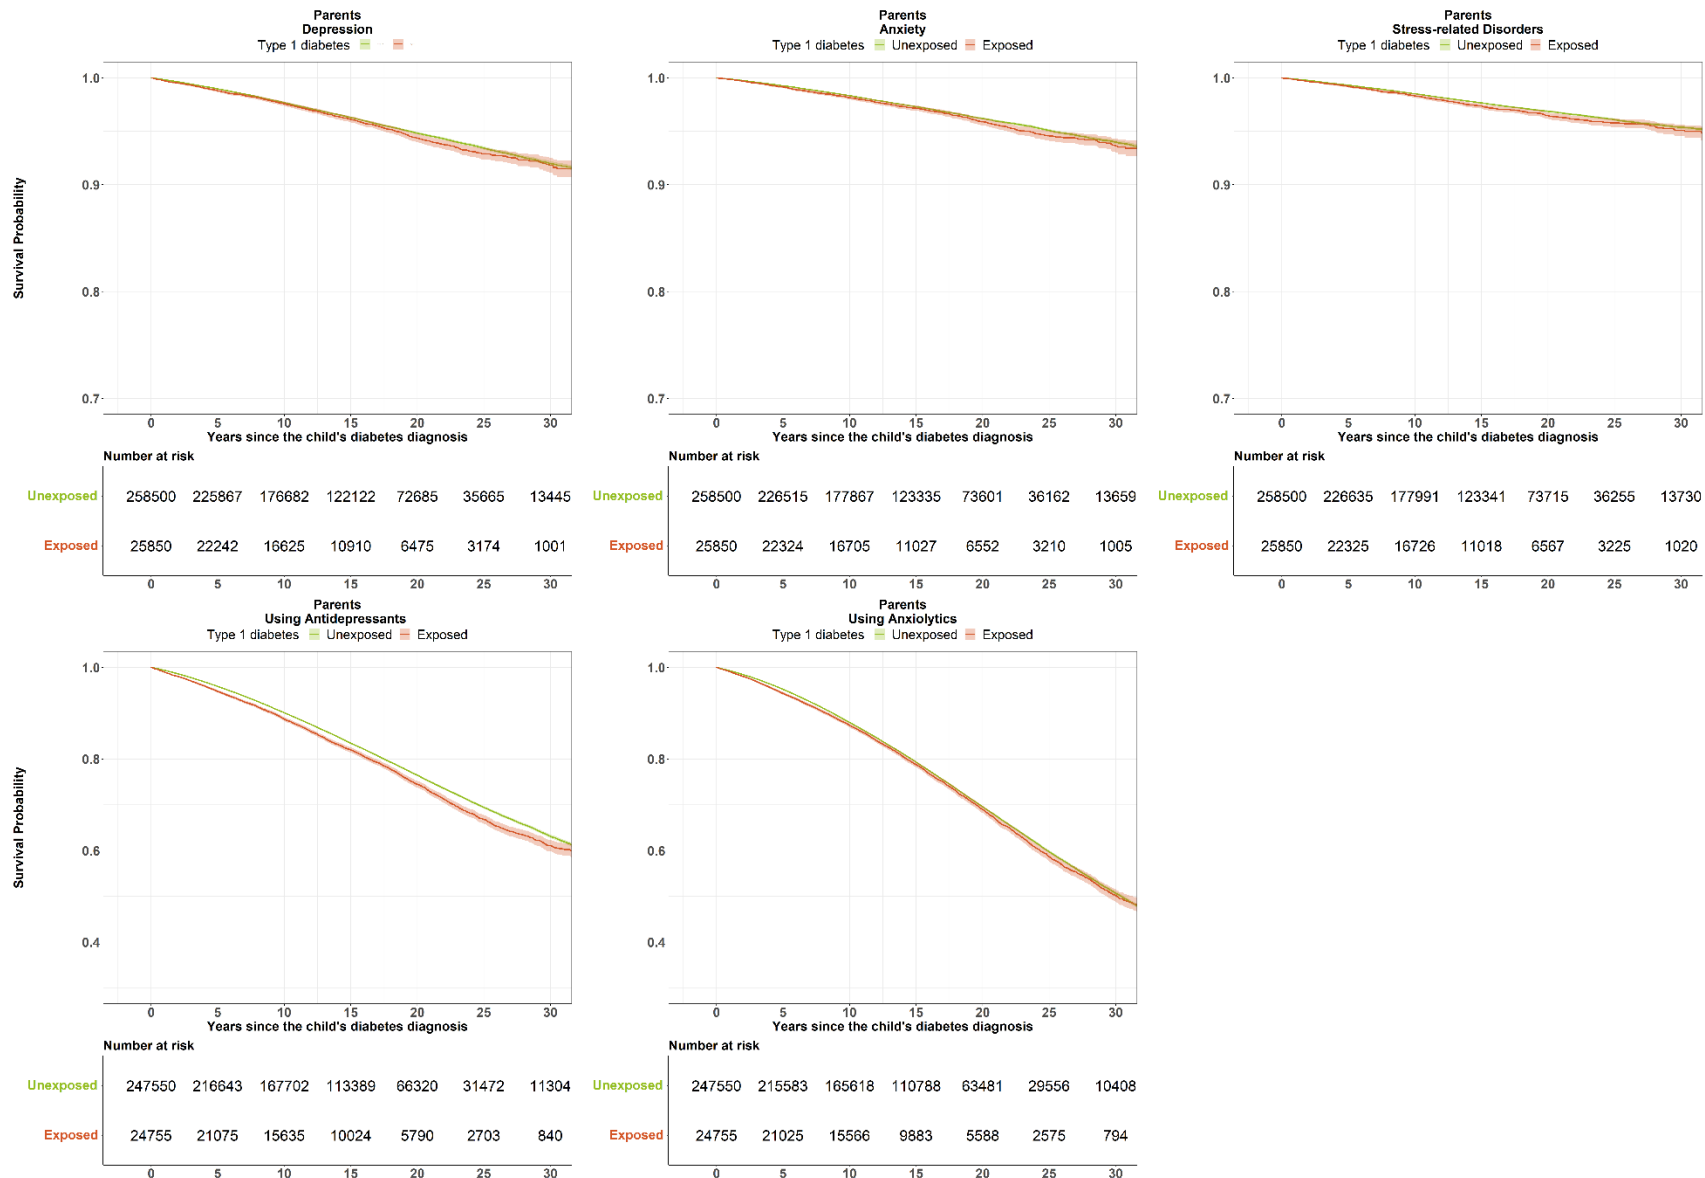

**Supplemental Figure S4** Survival curve of receiving specific diagnosis of depression, anxiety, or stress-related disorders, using antidepressants, and using anxiolytics in parents of individuals diagnosed with childhood-onset type 1 diabetes compared to the matched parents of individuals without childhood-onset type 1 diabetes

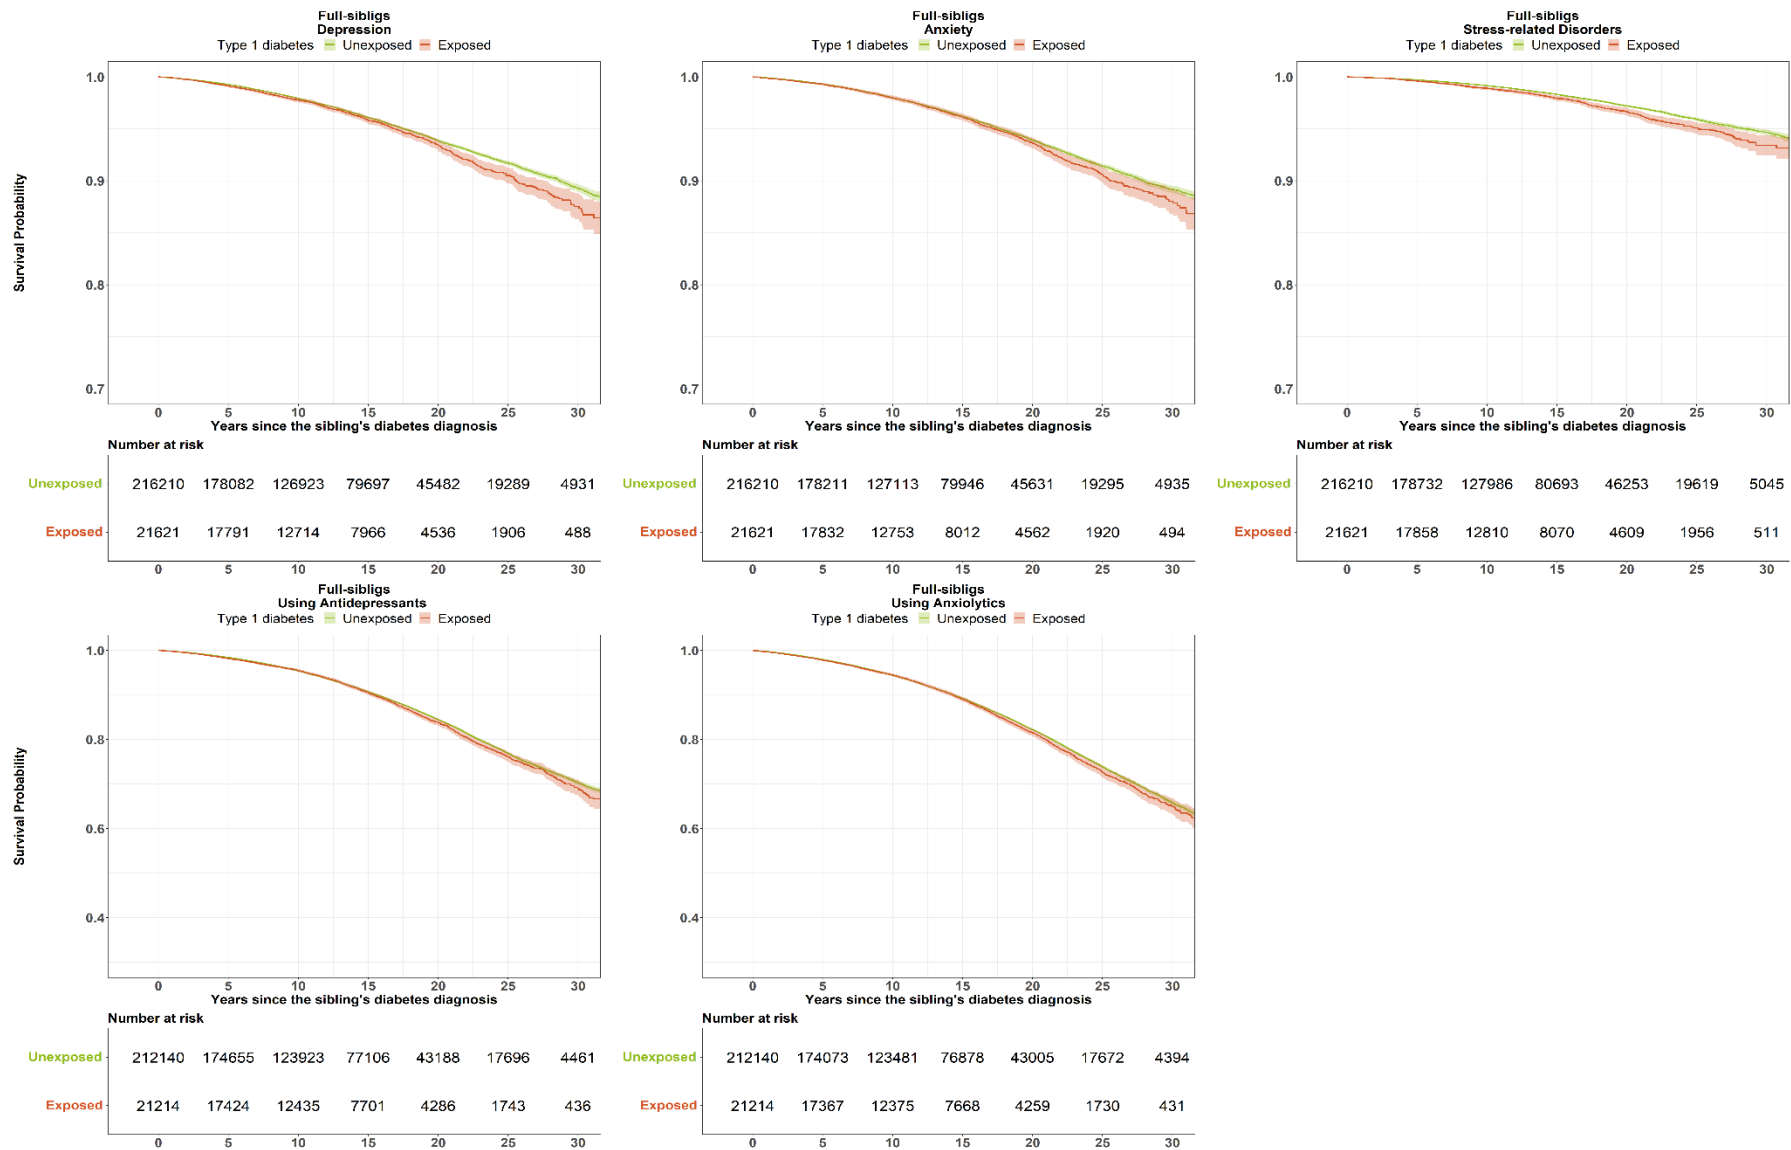

**Supplemental Figure S5** Survival curve of receiving specific diagnosis of depression, anxiety, or stress-related disorders, using antidepressants, and using anxiolytics in full-siblings of individuals diagnosed with childhood-onset type 1 diabetes compared to the matched full-siblings of individuals without childhood-onset type 1 diabetes

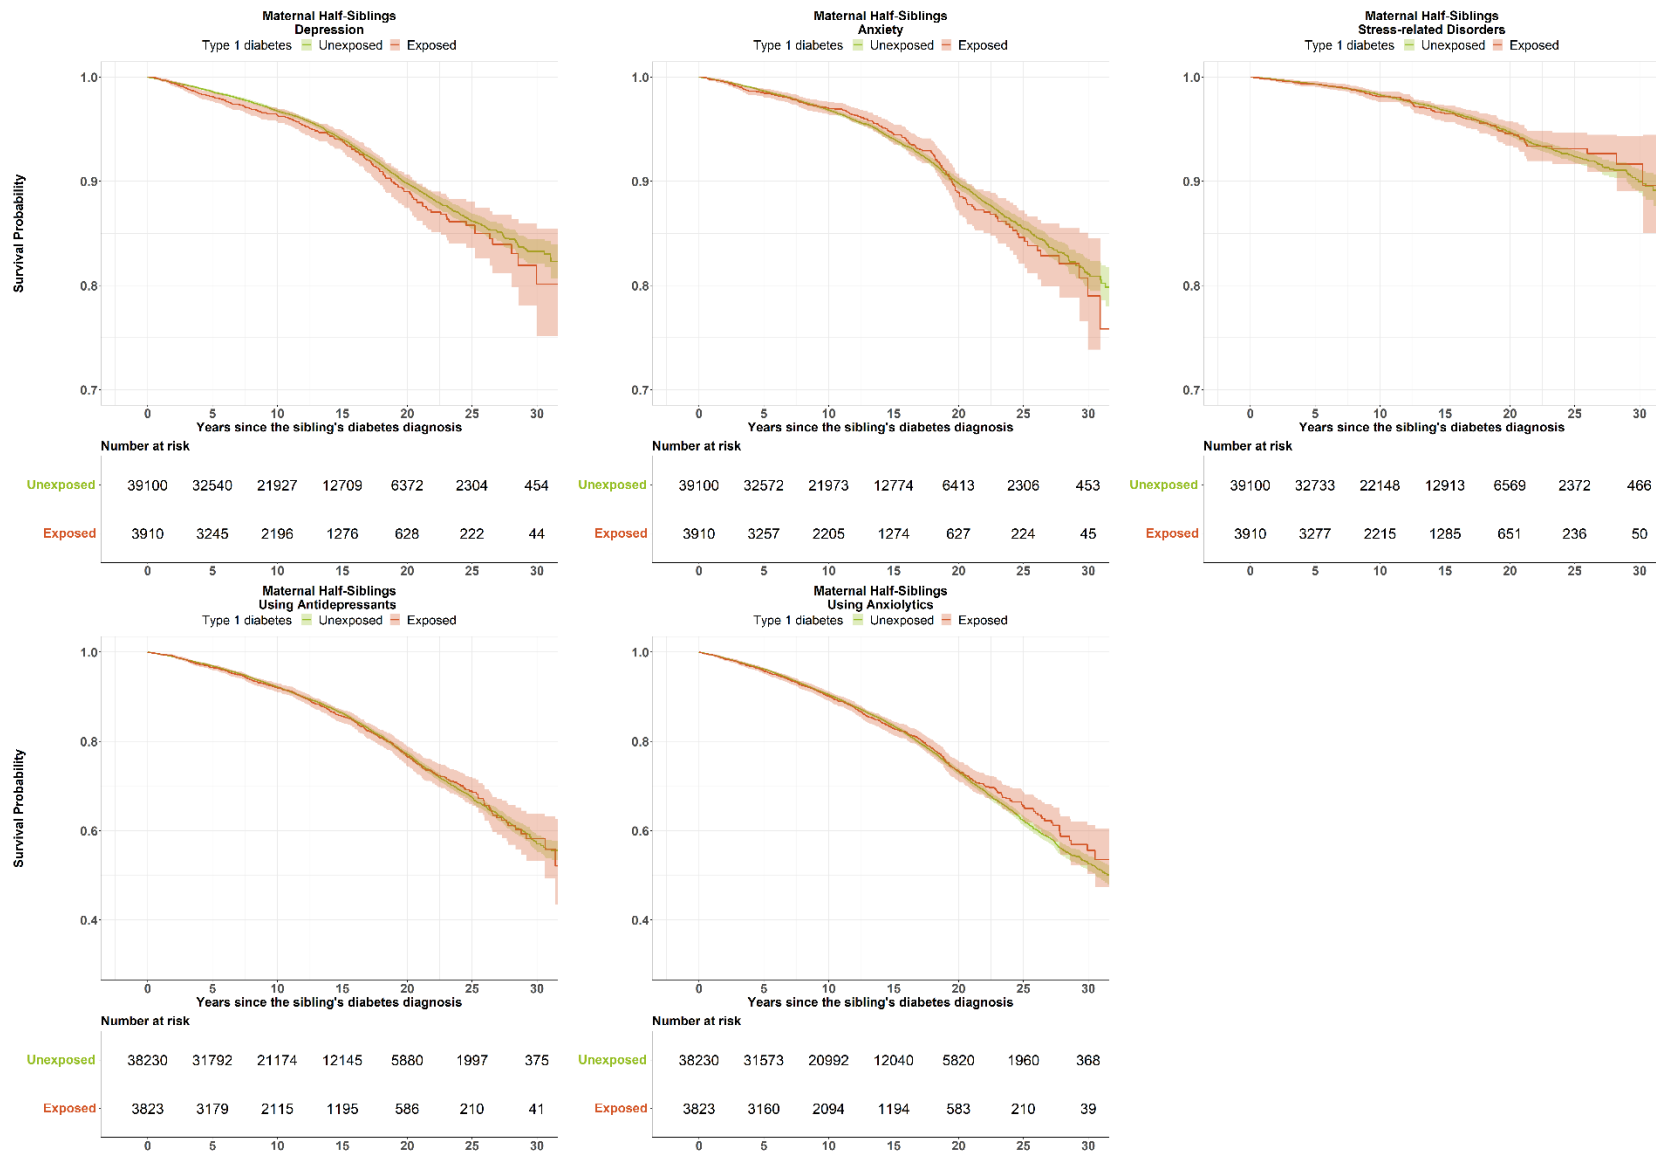

**Supplemental Figure S6** Survival curve of receiving specific diagnosis of depression, anxiety, or stress-related disorders, using antidepressants, and using anxiolytics in maternal half-siblings of individuals diagnosed with childhood-onset type 1 diabetes compared to the matched maternal half-siblings of individuals without childhood-onset type 1 diabetes.



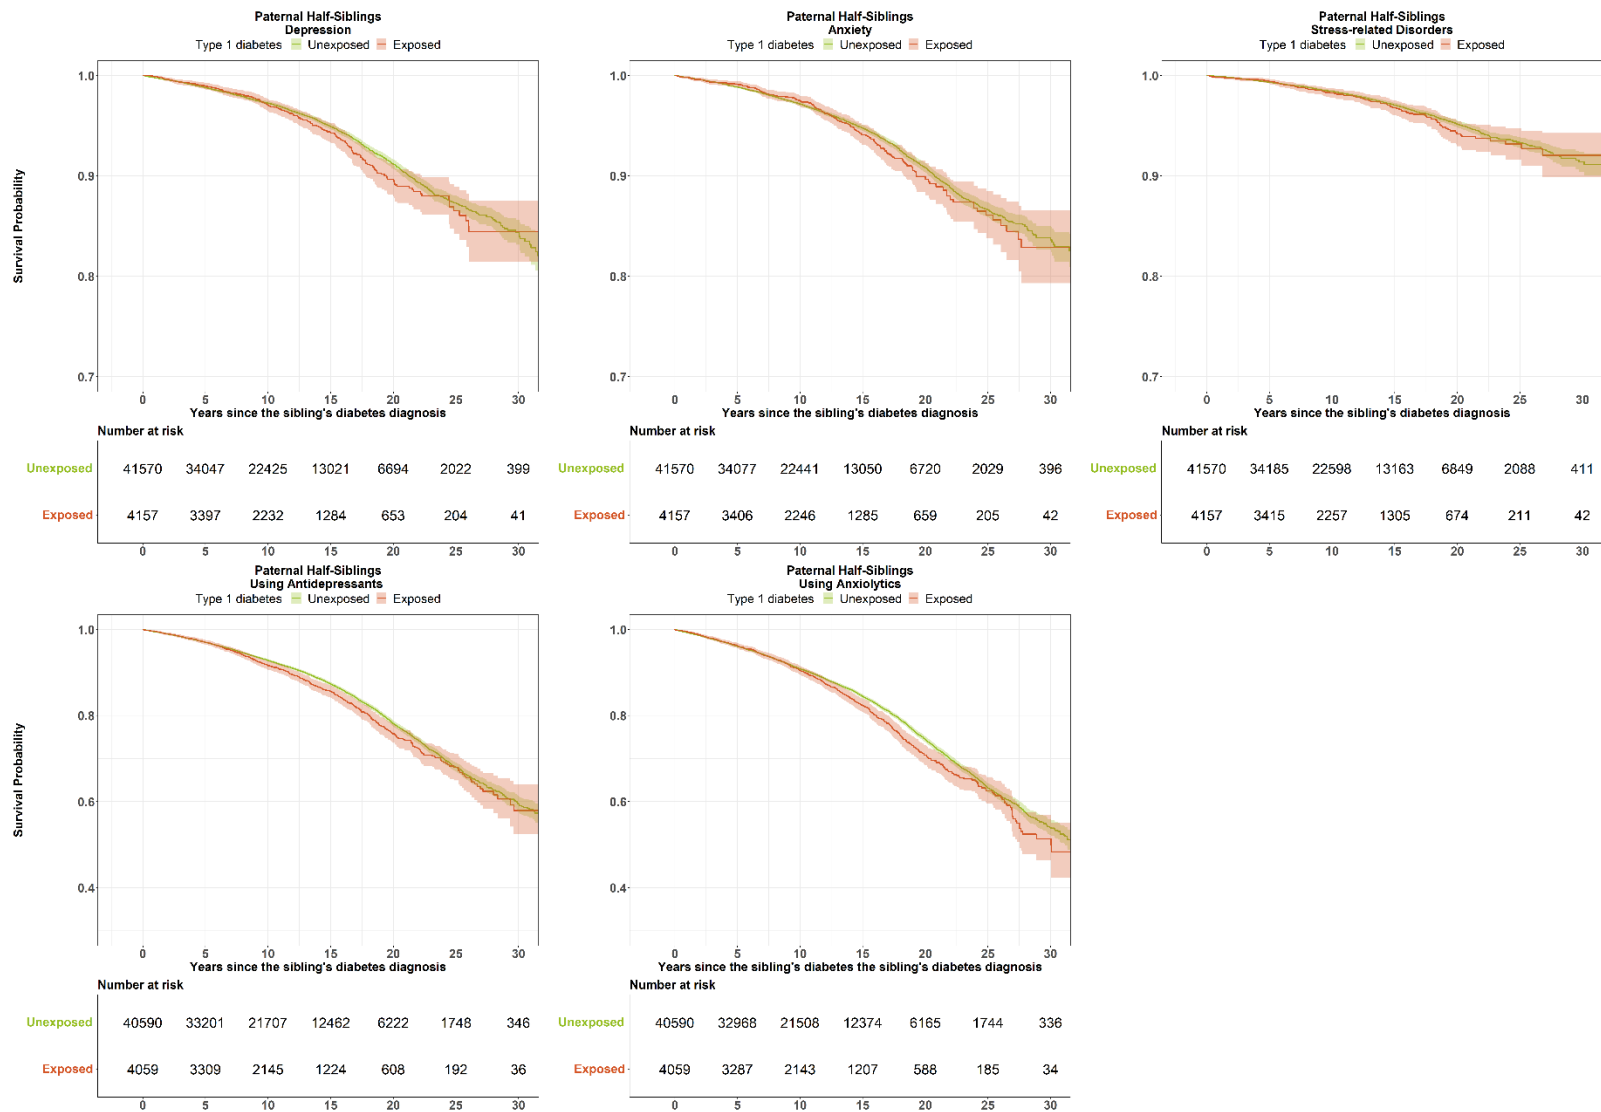

**Supplemental Figure S7** Survival curve of receiving specific diagnosis of depression, anxiety, or stress-related disorders, using antidepressants, and using anxiolytics in paternal half-siblings of individuals diagnosed with childhood-onset type 1 diabetes compared to the matched paternal half-siblings of individuals without childhood-onset type 1 diabetes.

**Supplemental File 1** Description of construction process of matched sub-samples from each relative sub-cohorts

From each relative sub-cohorts, a matched sub-sample was constructed for plotting Kaplan-Meier curves and estimating the absolute proportions with outcomes in the exposed and unexposed. We first identified individuals diagnosed with type 1 diabetes (Group A) and all their relatives (Group B) and identified individuals who were not diagnosed with type 1 diabetes (Group A') and all their relatives (Group B'). Anyone included in Group B did not appear in Group B', as they at least had one relative being diagnosed with type 1 diabetes. For each individual from Group B, who were considered as exposed, we randomly selected five individuals (unexposed) from Group B', matched on sex and birth-year.

## References

1. Eeg-Olofsson, K., et al., Glycemic control and cardiovascular disease in 7,454 patients with type 1 diabetes: an observational study from the Swedish National Diabetes Register (NDR). *Diabetes Care*, 2010. 33(7): p. 1640-6.
2. Samuelsson, U., et al., Continued improvement of metabolic control in Swedish pediatric diabetes care. *Pediatr Diabetes*, 2018. 19(1): p. 150-157.
3. Ludvigsson, J.F., et al., External review and validation of the Swedish national inpatient register. *BMC public health*, 2011. 11(1): p. 450.
4. Ekbom, A., The Swedish multi-generation register, in *Methods in Biobanking*. 2011, Springer. p. 215-220.
5. Ludvigsson, J.F., et al., Registers of the Swedish total population and their use in medical research. *European journal of epidemiology*, 2016. 31(2): p. 125-136.
6. Sun, S., et al., Association of psychiatric comorbidity with the risk of premature death among children and adults with attention-deficit/hyperactivity disorder. *JAMA psychiatry*, 2019. 76(11): p. 1141-1149.
7. Brikell, I., et al., Familial liability to epilepsy and attention-deficit/hyperactivity disorder: a nationwide cohort study. *Biological psychiatry*, 2018. 83(2): p. 173-180.
8. Statistics Sweden. Different families live in different ways—a survey on residence and support of children after a separation. Örebro: Statistics Sweden; 2014. [https://www.scb.se/Statistik/\\_Publikationer/BE0701\\_2013A01\\_BR\\_BE51BR1401.pdf](https://www.scb.se/Statistik/_Publikationer/BE0701_2013A01_BR_BE51BR1401.pdf). Accessed 4 March 2019.
